# Supplementary material for: Isolation of viable Babesia bovis merozoites to study parasite invasion
Source: Research Square preprint supplement (doi:10.21203/rs.3.rs-483884/v1), 2021-05-06

## **Supplementary information**

**Video 1. Live imaging microscopy of GFP-expressing *B. bovis*.** Parasites were imaged at a rate of 1 frame/30 seconds. The egress of a maltese stage parasite and invasion into new RBC, binary fission, and its egress could be seen.

**Sup Fig 1. Evaluation of filter isolated merozoites.** Free merozoites after one (a) or two rounds of filtration (b). Red arrows show intact iRBCs.

**Sup Fig 2. Indirect immunofluorescence microscopy of BbVEAP knockdown parasites.**

Indirect immunofluorescence microscopy test of BbVEAP-myc-*glmS* parasite in the absence (-) or presence (+) of GlcN at 24 h after invasion ( $\alpha$ -myc, green;  $\alpha$ -SBP4, red). The parasite nuclei were stained with Hoechst 33342 (blue). Scale bar = 5  $\mu$ m.

**Sup Fig. 1**

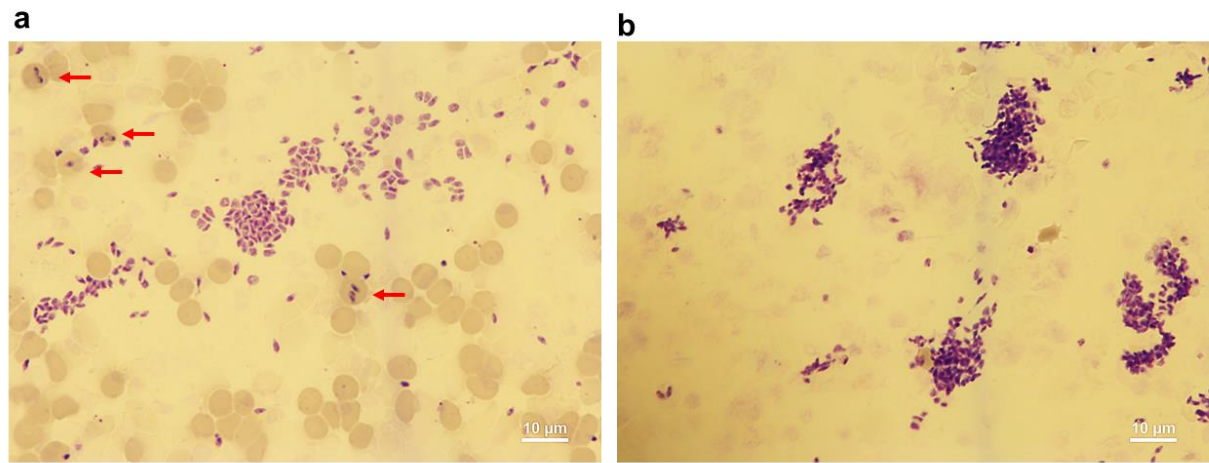

**Sup Fig. 2**

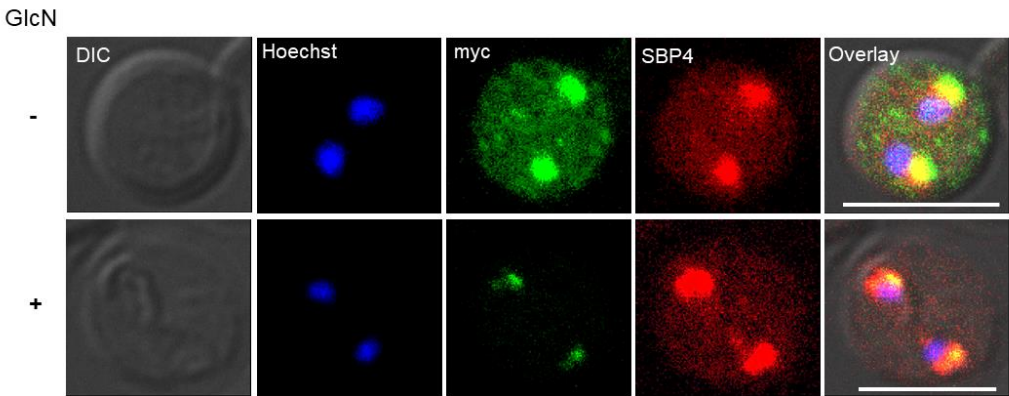

Supplement: Supplementary file 1 [file ad2ef3e933ca3ddc348d9501.pdf]
